# Supplementary material for: Exploring key genes and potential therapeutic and predictive targets between pyroptosis genes and adult extent of malignant glioma based on bioinformatics analysis
Source: Research Square preprint supplement (doi:10.21203/rs.3.rs-1298963/v1), 2022-02-18
Supplement: Supplementary file 1 [file 1bcc9db9047d11e0b7fa9159.docx]

Shandong Province Medical and Health Science and Technology Development Plan Project memorandum in uniting

| **Basic information of the project** | project name | LncRNATSIX regulates glial pain self-conditioning and co-mechanism hyperactivity | | | | |
| --- | --- | --- | --- | --- | --- | --- |
| project  number | **2019IS323** | Adventit  ia | On the  project | Funding  amount | **RMB 0.000** |
| Project year | **2020** | Start and end year | **2020.06-2022.06** | | |
| Subject code! | Cranial Brain and  Neurosurgery / 04-04 | Subject code 2 | **Chronic Chronic Surgery / 04-08** | | |
| **Project leader information** | surname | Cheng-long li | Gender | man | File birth | **1991.12.24** |
| Bachelor of science | Master | Job title | chief physici | contact number | **18763036453** |
| Fax |  | E-mail | **Iichenglong2017@ 126.com** | | |
| work unit | The Affiliated Hospital of Binzhou Medical College | | | | |
| **The project relies on the unit information** | name of  organizat | Affiliated Hospital of Binzhou aka College | | | contacts | Jing zheng |
| postal address | No.661, Huanghe Second Road, Binzhou City, Shandong Province | | | | |
| zip code | **256603** | | | contact number | **05433258355** |
| mail box | **[byfykjc@bz.shandong.cn](mailto:byfykjc@bz.shandong.cn)** | | | | |
| **Project supervisor position information** | name of organizat | Binzhou Medical College affiliated medical hard | | | contacts | Jing zheng |
| postal address | No.661, Huanghe Second Road, Binzhou City, Shandong Province | | | | |
| zip code | **256603** | | | contact number | **05433258355** |
| E-mail | **[byfykjc@bz.shandong.cn](mailto:byfykjc@bz.shandong.cn)** | | | | |
| **Cooperation unit information** |  | | | | | |
|  | | | | | |
|  | | | | | |
|  | | | | | |
